# Supplementary material
Source: publisher figshare collection journal article supplement (https://brill.figshare.com/ndownloader/files/40208233)
Supplement: Supplementary file 1 [file 40208233]

## Sheet: Table S1
River system	Population		Lat	Long	P. lessonae	Hybrids			P. ridibundus
		No.				♀	♂	?		n
Tisza River	Uzhgorod	1	48.61	22.29	2	10		5	13	30
Tisza River	Mynay	2	48.59	22.28		37		91		128
Tisza River	Dachne	3	48.47	22.24				9		9
Tisza River	Peresh	4	48.47	22.31	1			42		43
Tisza River	Chop-1	5	48.46	22.22		8			6	14
Tisza River	Chop-2	6	48.43	22.22		11				11
Tisza River	Velyka Dobron	7	48.43	22.39		13				13
Tisza River	Batievo	8	48.36	22.39				11		11
Tisza River	Zaluzzhya	9	48.36	22.85				5	11	16
Tisza River	Gat	10	48.32	22.64				7	3	10
Tisza River	Dunkovitsa	11	48.32	22.91		13				13
Tisza River	Kamenske	12	48.28	22.94				1	11	12
Tisza River	Velyka Bygan	13	48.25	22.58				8		8
Tisza River	Shalanky	14	48.23	22.89		7				7
Tisza River	Didove	15	48.22	22.58	3	6		38		47
Tisza River	Borzhava	16	48.22	22.85				5	10	15
Tisza River	Hust	17	48.17	23.29	1	11			5	17
Tisza River	Koroliove	18	48.15	23.13				18	3	21
Tisza River	Dyakove	19	48.02	23				3	9	12
Prut River	Kolomya-1	20	48.55	25.03					41	41
Prut River	Kolomya 2	21	48.52	25					7	7
Prut River	Drachyntsy	22	48.31	25.69					10	10
Lower Danude	Vylkove-1	23	45.43	29.67			6	1	22	29
Lower Danude	Vylkove-2	24	45.4	29.6		10	41	29	151	231
Lower Danude	Vylkove-3	25	45.39	29.72				5	12	17
Lower Danude	Vylkove-4	26	45.39	29.67	30		8			38
Lower Danude	Vylkove-5	27	45.36	29.68		2	10	1	16	29
Upper Dniester	Borshchyvka	28	49.92	25.94	1			7	9	17
Upper Dniester	Zaliztsy	29	49.79	25.37				9	17	26
Upper Dniester	Berezhany	30	49.45	24.94			1		26	27
Upper Dniester	Dovge	31	49.18	23.87					20	20
Upper Dniester	Morshyn-1	32	49.16	23.87	51	12	7	2		72
Upper Dniester	Morshyn-2	33	49.16	23.87	8	8		1		17
Upper Dniester	Monastyriska	34	49.09	25.18	3	1	8		10	22
Upper Dniester	Gusyatyn	35	49.07	26.2	1			2	29	32
Upper Dniester	Slobidka-Mushkativska	36	48.86	25.94				9	20	29
Upper Dniester	Konstantsia	37	48.85	25.95	2			1	6	9
Upper Dniester	Luchynchyk	38	48.7	27.81					10	10
Upper Dniester	Kotovsk	39	47.75	29.53			2	1	26	29
Upper Southern Bug	Shyroka Greblya	40	49.49	28.25	0			8	27	35
Upper Southern Bug	Kalynivka	41	49.45	28.52	1			17	5	23
Upper Southern Bug	Vinnytia	42	49.23	28.48	6	8	1	3	5	23
Upper Southern Bug	Yakushyntsi	43	49.26	28.37	12	3	2		29	46
Upper Southern Bug	Brailiv	44	49.11	28.16	10			10	2	22
Upper Southern Bug	Hrystynivka	45	48.83	29.99				3	24	27
Upper Southern Bug	Skaleva	46	48.74	30.89					13	13
Upper Southern Bug	Tarasivka	47	49.13	31.06					11	11
Upper Southern Bug	Uman-1	48	48.7	30.22				10	16	26
Upper Southern Bug	Uman-2	49	48.75	30.22	1			8	26	35
Upper Southern Bug	Fedorivka	50	48.38	32.16					8	8
Pripyat River	Selisok	51	51.84	25.49	4	1	8		1	14
Pripyat River	Shatsk	52	51.49	23.93		21	20			41
Pripyat River	Brunetivka	53	51.48	24.54		6	2			8
Pripyat River	Selezivka	54	51.48	28.06	11			17		28
Pripyat River	Svytyaz	55	51.47	23.85	4			7	21	32
Pripyat River	Manevychy	56	51.29	25.55				8		8
Pripyat River	Krichevychy	57	51.28	24.97		10	1			11
Pripyat River	Lutsk-1	58	50.74	25.3					18	18
Pripyat River	Lutsk-2	59	50.74	25.3	1			11	34	46
Pripyat River	Goshcha	60	50.6	26.7					15	15
Pripyat River	Lyubar	61	49.9	27.72	4			14	1	19
Pripyat River	Ladygy	62	49.69	27.41	2			13	10	25
Bug River	Kamyanka-Bugska	63	50.11	24.34					16	16
Desna River	Makyshyn	64	51.69	31.62	12			10	17	39
Desna River	Chernygiv	65	51.5	31.29	4			13	25	42
Desna River	Baturyn-1	66	51.34	32.88	19	2	8		18	47
Desna River	Baturyn-2	67	51.34	32.88	11	3	20	14	59	107
Desna River	Skunusove	68	51.3	33.83				0	19	19
Desna River	Podlypne	69	51.24	33.2			5		11	16
Desna River	Vertiivka	70	51.16	31.85	7	3	6	4		20
Desna River	Syvolozh	71	51.13	32.31	25		5	1		31
Desna River	Shevchenkovo	72	51.11	33.24	11			1	1	13
Desna River	Nizhyn-1	73	51.04	31.88				10	2	12
Desna River	Nizhyn-2	74	51.04	31.89	12	7	67			86
Desna River	Sulak	75	50.94	31.79				9	7	16
Upper Dnieper	Abakumy	76	51.98	30.85	5			4	27	36
Upper Dnieper	Velyka Syrovatka	77	50.83	34.95	5			3	2	10
Upper Dnieper	Romny	78	50.74	33.49	1				16	17
Upper Dnieper	Teteriv	79	50.69	29.62				1	22	23
Upper Dnieper	Vyshgorod-1	80	50.6	30.4	15	6	50	16		87
Upper Dnieper	Volodar-Volynskiy	81	50.6	28.44	6					6
Upper Dnieper	Kyiv (Almazne)	82	50.59	30.59					15	15
Upper Dnieper	Vyshgorod-2	83	50.59	30.49					16	16
Upper Dnieper	Novograd-Volynski	84	50.58	27.62				1	18	19
Upper Dnieper	Bilychi	85	50.57	30.69	77	5	7	28	19	136
Upper Dnieper	Novobilychi	86	50.57	30.69	129	10	95	26	236	496
Upper Dnieper	Feofaniya	87	50.57	30.69	4	5	12	35	187	243
Upper Dnieper	Teremky	88	50.57	30.69	1		2	2	139	144
Upper Dnieper	Zazymya	89	50.57	30.69	9			4	22	35
Upper Dnieper	Kyiv (Golosieve)	90	50.57	30.69					38	38
Upper Dnieper	Lisnyky	91	50.57	30.69	87			4	1	92
Upper Dnieper	Kyiv (Otradny_	92	50.57	30.69					40	40
Upper Dnieper	Kyiv (Sovky)	93	50.57	30.69					36	36
Upper Dnieper	Kyiv (Syrets)	94	50.57	30.69					40	40
Upper Dnieper	Gorenka	95	50.56	30.32					20	20
Upper Dnieper	Lisova Bucha	96	50.55	30.23					40	40
Upper Dnieper	Puscha-Vodytsya	97	50.55	30.34					19	19
Upper Dnieper	Nemishaeve	98	50.54	30.14	3			10	31	44
Upper Dnieper	Kyiv (Ministerka)	99	50.54	30.48					29	29
Upper Dnieper	Kyiv (Kurenivka)	100	50.52	30.44					185	185
Upper Dnieper	Kyiv (Obolon)	101	50.52	30.51					15	15
Upper Dnieper	Kyiv (Vynogradar)	102	50.51	30.4					50	50
Upper Dnieper	Irpin	103	50.51	30.24					78	78
Upper Dnieper	Kyiv (Gnylusha)	104	50.5	30.61					11	11
Upper Dnieper	Kyiv (Zakrevskogo str.)	105	50.5	30.6					36	36
Upper Dnieper	Kyiv (Pryozerna str)	106	50.49	30.51					40	40
Upper Dnieper	Kyiv (Nyvky)-1	107	50.46	30.41					17	17
Upper Dnieper	Kyiv (Nyvky)-2	108	50.45	30.42					43	43
Upper Dnieper	Kyiv (Verbne)	109	50.44	30.49					20	20
Upper Dnieper	Kyiv (Vyrlytsia)	110	50.44	30.52					51	51
Upper Dnieper	Kyiv (Velyki)	111	50.43	30.56				1	32	33
Upper Dnieper	Kyiv (Rayduzhne)	112	50.43	30.43					29	29
Upper Dnieper	Kyiv (Telbyn)	113	50.43	30.61					20	20
Upper Dnieper	Kyiv (Slavy park)	114	50.42	30.67	4			12	5	21
Upper Dnieper	Kyiv (Sonyachne)	115	50.41	30.68					7	7
Upper Dnieper	Kyiv (Borshchagivka)	116	50.41	30.35					22	22
Upper Dnieper	Kiev (Revutskogo str.)	117	50.4	30.64					11	11
Upper Dnieper	Kyiv (Nyzhni Sady)	118	50.39	30.61	1			6	17	24
Upper Dnieper	Kyiv (Lysa Gora)	119	50.39	30.54				2	201	203
Upper Dnieper	Kyiv (Ippodrome)	120	50.39	30.43					39	39
Upper Dnieper	Kyiv (Nyzhnya Telychka)	121	50.39	30.57					11	11
Upper Dnieper	Kyiv (Klymentove)	122	50.38	34.93				2	9	11
Upper Dnieper	Kryukivshchyna	123	50.37	30.36	1		8	19	7	35
Upper Dnieper	Kyiv (Berizka)	124	50.37	30.54	3			6	8	17
Upper Dnieper	Kyiv (Kytayiv)	125	50.37	30.53				1	44	45
Upper Dnieper	Baryshivka	126	50.36	31.31	11	9	25	27	1	73
Upper Dnieper	Boyarka	127	50.33	30.3			7	1	23	31
Upper Dnieper	Hotiv	128	50.33	30.47					54	54
Upper Dnieper	Koncha-Zaspa-1	129	50.31	30.57				13	7	20
Upper Dnieper	Novoselky	130	50.31	30.07					43	43
Upper Dnieper	Koncha-Zaspa-2	131	50.3	30.52				1	17	18
Upper Dnieper	Zhytomyr	132	50.27	28.67				2	19	21
Upper Dnieper	Pyryatyn	133	50.24	32.5	23			8		31
Upper Dnieper	Panfily	134	50.21	31.79					7	7
Upper Dnieper	Berezenshchyna	135	50.2	30.3				6	23	29
Upper Dnieper	Koncha-Zaspa-3	136	50.2	30.68	1			2	10	13
Upper Dnieper	Motovylivka	137	50.13	30.05	1			7	21	29
Upper Dnieper	Stepanivka	138	50.12	32.25	54	4	4	5		67
Upper Dnieper	Sorochye	139	50.12	29.94	1			8	20	29
Upper Dnieper	Trypillia	140	50.1	30.75					22	22
Upper Dnieper	Chervonokutsk	141	50.06	35.15	55			8		63
Upper Dnieper	Kolontayv	142	49.99	34.97				1	11	12
Upper Dnieper	Brovky	143	49.93	29.2	15			9		24
Middle Dnieper	Novoivanivka	144	49.84	35.31					34	34
Middle Dnieper	Chornorudka	145	49.83	29.06	6	7	7	4	4	28
Middle Dnieper	Uzyn	146	49.82	30.41				8	3	11
Middle Dnieper	Bila Tserkva	147	49.81	30.11				2	17	19
Middle Dnieper	Erchyky	148	49.79	29.51	3			13	11	27
Middle Dnieper	Kaniv	149	49.75	31.46	1			19	12	32
Middle Dnieper	Myronivka	150	49.66	31.01					29	29
Middle Dnieper	Poltava	151	49.6	34.54					11	11
Middle Dnieper	Lyashyvka	152	49.54	32.68	1	5	20	1		27
Middle Dnieper	Kapinerne	153	49.19	35.03	12				3	15
Middle Dnieper	Orel Rver	154	49.16	35.04				4	7	11
Middle Dnieper	Buky	155	49.08	30.4					10	10
Middle Dnieper	Dobryanka	156	48.78	30.88					9	9
Middle Dnieper	Vol'ne	157	48.77	35.31					20	20
Middle Dnieper	Bogdanivka-1	158	48.77	32.54	26			6		32
Middle Dnieper	Bogdanivka-2	159	48.7	32.51				1	29	30
Lower Dnieper	Askania Nova	160	46.45	33.87					18	18
Lower Dnieper	Oleshky	161	46.61	32.72			14		19	33
Lower Dnieper	Kozatske	162	46.78	33.24			20		20	40
Lower Dnieper	Antonivka	163	46.78	33.83					7	7
Donets River	Pivdenne	164	49.88	36.07			10		10	20
Donets River	Merefa	165	49.82	36.06			20		6	26
Donets River	Gaydary	166	49.64	36.31		4	99	51	149	303
Donets River	Iskiv	167	49.63	36.29			34	1		35
Donets River	Koryakiv	168	49.63	36.31			24		2	26
Donets River	Gomilsha	169	49.56	36.31		1	20	46		67
Donets River	Gorochovatka	170	49.37	37.53					7	7
Donets River	Izyum	171	49.19	37.28					18	18
Donets River	Slavyansk	172	48.85	37.62					31	31
Donets River	Stanychno-Luganske 1	173	48.68	39.46					24	24
Donets River	Stanychno-Luganske 2	174	48.67	39.47					37	37
Crimea rivers	Syvash	175	46.24	34.42					8	8
Crimea rivers	Radyanske	176	45.57	34.49					14	14
Azov Sea coastal rivers	Berdyansk	177	46.76	36.81					22	22
Black Sea coastal rivers	Sasyk	178	45.67	29.72					12	12
Total					821	269	706	939	3846	6581
